# Supplementary material
Source: Research Square preprint supplement (doi:10.21203/rs.3.rs-9003906/v1)
Supplement: Supplementary file 1 [file 0fac3f1ac4db90233e86339d.doc]

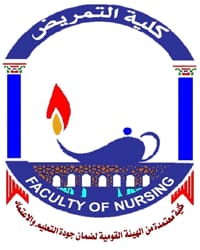

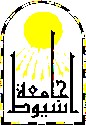


**Patient oncofertility questionnaire**

**Tool 1:**

**Part I:** **Demographics & general data**

- - - 1. **Questionnaire ID:** **_______________**
      2. **Patient Name:** _______________
      3. **Age:** _________
      4. **Telephone number:** _______________
      5. **Residence:** _______________
- Rural ( )
- Urban ( )
  - - 1. **Educational level:**
- Illiterate ( )
- Basic education ( )
- Secondary ( )
- University ( )
- Postgraduate ( )
  - - 1. **Occupation:**
- House wife ( )
- Employed ( )
  - - 1. **Marital status:**
- Married ( )
- Single ( )
  - - 1. **Family income**
- Insufficient
- Sufficient
  - - 1. **Height/cm ( ) Weight/ kg ( ) BMI ( )**

**Part 2: Obstetrical/ labour data & fertility knowledge**

1. **What is your pregnancy history? (Please select all that apply to you)**

- Have no pregnancy yet
- Currently pregnant
- Trying to get pregnant
- Have been pregnant before
- Other ____________________

1. **How many times have you been pregnant (including miscarriages or abortions)?**

- 1
- 2-4
- < 4

1. **Do you have any children?**

- Yes
- No

1. **How many children do you have?**

- 1
- 2-4
- < 4

1. **Last delivery since ( ) months/ year**
2. **Last pregnancy complications:**

- No ( )
- Pregnancy induced hypertension ( )
- Gestational diabetes ( )
- Heart disease ( )
- Antepartum hemorrhage ( )
- Abortion ( )
- Anemia ( )
- Others ( )

1. **Type of last delivery:**

- Normal ( )
- CS ( )

1. **Birth problems:**

- No ( )
- Prolonged labor ( )
- Obstructed labor ( )
- Post-partum Hemorrhage ( )
- Wound infection ( )
- Others ( )

1. **Thought about pregnancy**

- No
- Yes

**Part 3: cancer and treatment related variables**

1. Cancer type/localization: ( )
2. Stage of cancer: ( )
3. Metastasis status: ( )
4. Cancer treatment:

- Surgical ( )
- Chemotherapy ( )
- Radiotherapy ( )
- Combination ( )

1. Duration after completed the cancer treatment-in months: ( )
2. Fertility preservation option: Yes ( ) No ( )

**Part 4: Reproductive history**

|  | **Yes** | **No** | **Not sure** |
| --- | --- | --- | --- |
| I suffer from severe period pains |  |  |  |
| I have had pelvic surgery |  |  |  |
| My menstrual cycle is unpredictable. My period often comes more than 5 days earlier or later than expected (When I am not using contraceptives) |  |  |  |
| My menstrual cycle lasts less than 21 days (when I am not using contraceptives) |  |  |  |
| My menstrual cycle lasts more than 35 days (when I am not using contraceptives) |  |  |  |
| I suffer from endometriosis |  |  |  |
| I have had pelvic inflammatory disease (PID) |  |  |  |
| I do not have a period (when I am not using contraceptives) |  |  |  |

**Tool 2: The Infertility Knowledge Questionnaire (IKQ) Scale**:

| **Item** | **True**  **=1** | **False**  **=** | **Do Not Know** |
| --- | --- | --- | --- |
| **General infertility knowledge items:** | | | |
| 1. Infertility is defined as a couple unable to get pregnant despite having routine, unprotected sex for 2 years or more. |  |  |  |
| 1. The invitro fertilization success rate for women at age 40 is 50% |  |  |  |
| **Cancer/treatment‐specific items:** | | | |
| 1. The risk of infertility is higher in women diagnosed with cancer than those of the same age without cancer |  |  |  |
| 1. Surgical treatment of female reproductive system increases the risk of infertility |  |  |  |
| 1. Pelvic and abdominal radiotherapy increases the risk of infertility or preterm birth |  |  |  |
| 1. Chemotherapy may induce premature ovarian failure and menopausal symptoms |  |  |  |
| 1. Hormonal therapy such as tamoxifen may increase the risk of fetal deformities |  |  |  |
| 1. Return to normal menstrual cycles after treatment represents the ability to become pregnant |  |  |  |
| 1. Protective measures of the reproductive organs employed by Western medical practitioners are safe and without side effects |  |  |  |
| 1. Pregnant within 6 months after the completion of chemotherapy increases the risks of fetal deformities or stillbirth |  |  |  |
| 1. Protecting the reproductive organs after the completion of cancer treatment increases the chance of pregnancy |  |  |  |

**Tool 3: The Reproductive Concerns after Cancer (RCAC) scale:**

|  | **Strongly agree**  **5** | **Agree**  **4** | **Neither agree nor disagree**  **3** | **Disagree**  **2** | **Strongly disagree**  **1** |
| --- | --- | --- | --- | --- | --- |
| 1. I am afraid I won’t be able to have any (more) children |  |  |  |  |  |
| 1. I am worried about my ability to get pregnant again) |  |  |  |  |  |
| 1. I am concerned that I may not be able to have more) children |  |  |  |  |  |
| 1. I worry about telling my (potential) pouse/partner that I may be unable to have children |  |  |  |  |  |
| 1. I am concerned that my (potential) spouse/partner will be disappointed if I can’t get pregnant |  |  |  |  |  |
| 1. The thought of telling my (potential) spouse/partner that I may be unable to have children makes me uncomfortable |  |  |  |  |  |
| 1. I am worried about passing on a genetic risk for cancer to my children |  |  |  |  |  |
| 1. I am worried about how my family history might affect my children’s health |  |  |  |  |  |
| 1. I am afraid my children would have a high chance of getting cancer |  |  |  |  |  |
| 1. I am scared of not being around to take care of my children someday |  |  |  |  |  |
| 1. Having (more) children will make me more nervous about getting cancer again |  |  |  |  |  |
| 1. I am cautious about having (more) children because I might not be around to raise them |  |  |  |  |  |
| 1. I can accept it if I’m unable to have (more) children **a** |  |  |  |  |  |
| 1. I will be happy with life whether or not I have (more) children someday **a** |  |  |  |  |  |
| 1. I will feel content if I do not have (more) children **a** |  |  |  |  |  |
| 1. I am overwhelmed by thought of trying to get pregnant (again) |  |  |  |  |  |
| 1. I worry that getting pregnant (again) would take too much time and effort |  |  |  |  |  |
| 1. It is stressful to think about trying to get pregnant (again) |  |  |  |  |  |

Response scales range 1–5

**a** Reverse-coded, higher scores indicate lower acceptance of not having children

**Tool 4: Fertility intention scale (FIS):**

| **Item** | **Strongly agree**  **5** | **Agree**  **4** | **Neither agree nor disagree**  **3** | **Disagree**  **2** | **Strongly disagree**  **1** |
| --- | --- | --- | --- | --- | --- |
| *Factor 1: pregnancy risk* | | | | | |
| 10. I feel being pregnant will not place an extra burden on my body. |  |  |  |  |  |
| 11. I feel I can handle being pregnant. |  |  |  |  |  |
| 12. I feel I can handle taking care of children. |  |  |  |  |  |
| 19. I feel pregnancy will not increase the risk of illness recurrence. |  |  |  |  |  |
| 6. If I do get pregnant, I feel I am going to be safe. |  |  |  |  |  |
| 5. If I do get pregnant, I feel my baby is going to be safe. |  |  |  |  |  |
| *Factor 2: disease control* | | |  | | |
| 2. I am positive regarding my prognosis. |  |  |  |  |  |
| 4. I feel my overall health is good. |  |  |  |  |  |
| 3. I feel my symptoms have been controlled. |  |  |  |  |  |
| 9. I feel the recurrence rate of my illness is low. |  |  |  |  |  |
| *Factor 3: social support* | | |  | | |
| 13. I feel financially I can handle raising a child. |  |  |  |  |  |
| 14. I feel I can get enough resources to raise a child. |  |  |  |  |  |
| 15. I feel I have received enough information for my pregnancy. |  |  |  |  |  |
| *Factor 4: happiness* | | | | | |
| 7. I feel being pregnant will make me happier. |  |  |  |  |  |
| 8. I feel being pregnant will bring me new hope. |  |  |  |  |  |

**Tool 5: decisional conflict scale (DCS)**:

| **Item** | **Strongly agree**  **0** | **Agree**  **1** | **Neither agree nor disagree**  **2** | **Disagree**  **3** | **Strongly disagree**  **4** |
| --- | --- | --- | --- | --- | --- |
| 1. I know which options are available to me. |  |  |  |  |  |
| 1. I know the benefits of each option. |  |  |  |  |  |
| 1. I know the risks and side effects of each option. |  |  |  |  |  |
| 1. I am clear about which benefits matter most to me. |  |  |  |  |  |
| 1. I am clear about which risks and side effects matter most to me. |  |  |  |  |  |
| 1. I am clear about which is more important to me (the benefits or the risks and side effects). |  |  |  |  |  |
| 1. I have enough support from others to make a choice. |  |  |  |  |  |
| 1. I am choosing without pressure from others. |  |  |  |  |  |
| 1. I have enough advice to make a choice. |  |  |  |  |  |
| 1. I am clear about the best choice for me. |  |  |  |  |  |
| 1. I feel sure about what to choose. |  |  |  |  |  |
| 1. This decision is easy for me to make. |  |  |  |  |  |
| 1. I feel I have made an informed choice. |  |  |  |  |  |
| 1. My decision shows what is important to me. |  |  |  |  |  |
| 1. I expect to stick with my decision. |  |  |  |  |  |
| 1. I am satisfied with my decision. |  |  |  |  |  |
